# Supplementary material
Source: PubMed Central journal article supplement (PMC4113422)
Supplement: NIHMS612409-supplement-Supplement.pdf [file NIHMS612409-supplement-Supplement.pdf]

## SUPPLEMENTARY MATERIALS

for Uemura et al. "Crystal structure of the ligand binding form of nanoRNase from *Bacteroides fragilis*, a member of the DHH/DHHA1 phosphoesterase family of proteins"

### Supplementary Methods

#### *SI. Protein preparation*

The amplified fragment of the bfNrn gene (ORF ID: BF3670) was engineered into pET-21d and the resulting expression construct was used to transform *E. coli* Rosetta™2(DE3)pLysS cells (Merck, Darmstadt, Germany). Cells harboring the expression construct were cultured at 37°C in 1.5 l LB medium containing 50 µg /ml ampicillin to a density of  $1 \times 10^8$  cells/ml before addition of isopropyl β-D-1-thiogalactopyranoside (50 µg/ml). The culture was then continued for a further 6 h before harvesting the cells by centrifugation. The cell pellet was stored at –20°C until required. The following procedures were carried out at 4°C except for size exclusion chromatography. Frozen cells (8 g) were thawed, suspended in 80 ml of 50 mM Tris-HCl (pH 8.0), 500 mM NaCl, 1 mM phenylmethylsulfonyl fluoride and 5 mM imidazole, and disrupted by sonication on ice. The lysate was then clarified by centrifugation (38,000 g for 60 min). The resultant supernatant was loaded onto a His-Bind resin (Merck) column (bed volume, 10 ml) equilibrated with 20 mM Tris-HCl (pH 8.0), 500 mM NaCl and 5 mM imidazole. Bound proteins were eluted with a linear gradient of 0.05–0.5 M imidazole (total volume, 200 ml). Fractions containing the target protein were pooled and concentrated with a Vivaspin (10,000 molecular weight cutoff) concentrator. The concentrated protein solution was then subjected to size exclusion chromatography using a Superdex 75 HR 10/30 column (GE Healthcare Biosciences) equilibrated with 20 mM Tris-HCl (pH 7.5), 100 mM NaCl. Chromatography was carried out on an ÄKTA explorer system (GE Healthcare Biosciences) at 20°C. Fractions containing the target protein (identified by SDS-PAGE) were concentrated and stored at 4°C.

The concentration of the purified protein was determined using the molar absorption coefficient at 280 nm calculated with the Protpram program of Expert Protein Analysis System (ExPASy) proteomics server (<http://www.expasy.org/>). Approximately 3.5 mg bfNrn was obtained from 8 g of cells.

### *S2. Exonuclease activity assay*

The assay was performed as described previously [1]. Briefly, the reaction mixture (10  $\mu$ l) contained 50 mM HEPES-KOH (pH 7.5), 100 mM KCl, 5 mM MnCl<sub>2</sub> (or 5 mM EDTA), 10 nM 5'-<sup>32</sup>P-labeled 11-mer ssDNA and 1  $\mu$ M bfNrn. The assay was carried out using various substrates of different length i.e., 10 nM 5'-<sup>32</sup>P-labeled ssDNA (3, 6, or 11-mer), 10  $\mu$ M cold ssDNA (3, 6, or 11-mer) and 500 nM bfNrn in 50 mM HEPES-KOH, pH 7.5, 100 mM KCl and 5 mM MnCl<sub>2</sub>. The mixture was incubated at 37°C before stopping the reaction by addition of 1  $\mu$ l of 100 mM EDTA and 11  $\mu$ l of phenol/chloroform. Analysis of the degradation product by mass spectrometry was performed as described previously [2].

### *S3. Phosphatase activity assay*

The reaction mixture (100  $\mu$ l) contained 50 mM Tris-HCl (pH 7.5), 100 mM KCl, 5 mM MnCl<sub>2</sub>, 25  $\mu$ M adenosine 3',5'-bisphosphate (pAp), guanosine 3',5'-bisphosphate (pGp), adenosine 2',5'-bisphosphate, 3'-AMP, or c-di-GMP and 500 nM bfNrn. Reactions were incubated at 37°C for 6 h and then stopped by addition of 20  $\mu$ l of 100 mM EDTA. An equal volume (120  $\mu$ l) of buffer I (50 mM Tris-HCl (pH 7.5), 5 mM tetra-*n*-butylammonium hydroxide and 10% methanol) was added, and the protein was removed by ultrafiltration using a membrane filter (10,000 molecular weight cutoff). A 200- $\mu$ l aliquot of the filtrate was applied to a reversed-phase column (CAPCELL PAK C18 (Shiseido)) equilibrated with buffer I. Bound material was subsequently eluted using a gradient of 10 to 50% methanol. To compare the phosphatase activity, the inorganic phosphate was measured using a

colorimetric assay [3].

## Supplementary Tables

**Supplementary Table S1.** Data collection and refinement statistics.

| Dataset                                    | bfNrn-Mn <sup>2+</sup> -GMP complex |                            |
|--------------------------------------------|-------------------------------------|----------------------------|
| Wavelength (Å)                             | 1.000                               | 1.892                      |
| Resolution (Å)                             | 50–2.95 (3.00-2.95)                 | 50–3.20 (3.26-3.20)        |
| Space group                                | <i>P</i> 3 <sub>2</sub> 21          | <i>P</i> 3 <sub>2</sub> 21 |
| Cell constants (Å) a, b, c                 | 90.8, 90.8, 107.9                   | 90.9, 90.9, 108.0          |
| Cell angles (°) α, β, γ                    | 90, 90, 120                         | 90, 90, 120                |
| Data collection                            |                                     |                            |
| Observed reflections                       | 205804                              | 91960                      |
| Unique reflections                         | 11209 (556)                         | 8823 (438)                 |
| Completeness (%)                           | 99.8 (100)                          | 99.5 (100)                 |
| Redundancy                                 | 21.9 (22.3)                         | 10.4 (10.9)                |
| <i>I</i> / $\sigma$ ( <i>I</i> )           | 48.6 (12.8)                         | 42.3 (10.4)                |
| <i>R</i> <sub>merge</sub> (%) <sup>a</sup> | 9.2 (30.2)                          | 10.3 (29.9)                |
| Refinement <sup>d</sup>                    |                                     |                            |
| <i>R</i> -factor (%) <sup>b</sup>          | 22.09                               |                            |
| <i>R</i> <sub>free</sub> (%) <sup>c</sup>  | 26.08                               |                            |
| Average B-factor (Å <sup>2</sup> )         | 61.2                                |                            |
| Stereochemistry                            |                                     |                            |
| r.m.s d <sup>e</sup>                       |                                     |                            |
| Bonds lengths (Å)                          | 0.007                               |                            |
| Bond angles (°)                            | 1.313                               |                            |

<sup>a</sup> Values in parentheses are for the outermost shell.

<sup>b</sup>  $R_{\text{merge}} = \frac{\sum_{\text{hkl}} \sum_i |I_i(\text{hkl}) - I(\text{hkl})|}{\sum_{\text{hkl}} \sum_i I_i(\text{hkl})}$ , where  $I_i(\text{hkl})$  is the observed intensity and  $I(\text{hkl})$  is the averaged intensity for multiple measurements.

<sup>c</sup>  $R\text{-factor} = \frac{\sum ||F_{\text{obs}}| - |F_{\text{calc}}||}{\sum |F_{\text{obs}}|}$

<sup>d</sup>  $R_{\text{free}}$  is monitored with 5% of the reflection data excluded from refinement.

<sup>e</sup> Over 90% of main-chain dihedrals fall within the ‘most favored regions’ of the Ramachandran plot.

## Supplementary Figures

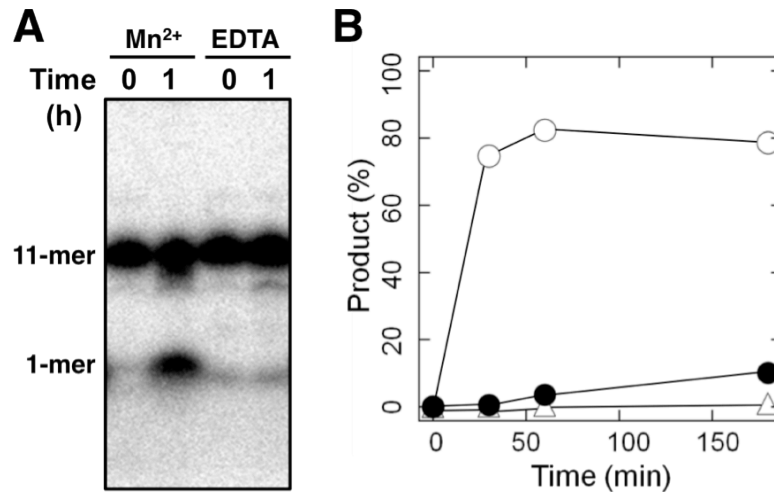

**Supplementary Fig. S1.** Exonuclease activity of bfNrn. (A) Dependence of enzyme activity on Mn<sup>2+</sup>. An aliquot of 10 nM 5'-<sup>32</sup>P-labeled 11-mer oligodeoxyribonucleotide was reacted with 1 μM bfNrn at 25°C. The reaction mixtures contained 50 mM HEPES (pH 7.5), 100 mM KCl and 5 mM MnCl<sub>2</sub> or 50 mM EDTA. (B) Dependence on substrate length. Reactions were performed as described in (A) except for a lower concentration of bfNrn (0.5 μM) and the addition of 10 μM unlabeled oligodeoxyribonucleotide. Circles, 3-mer; filled circles, 6-mer; triangles, 11-mer.

**A**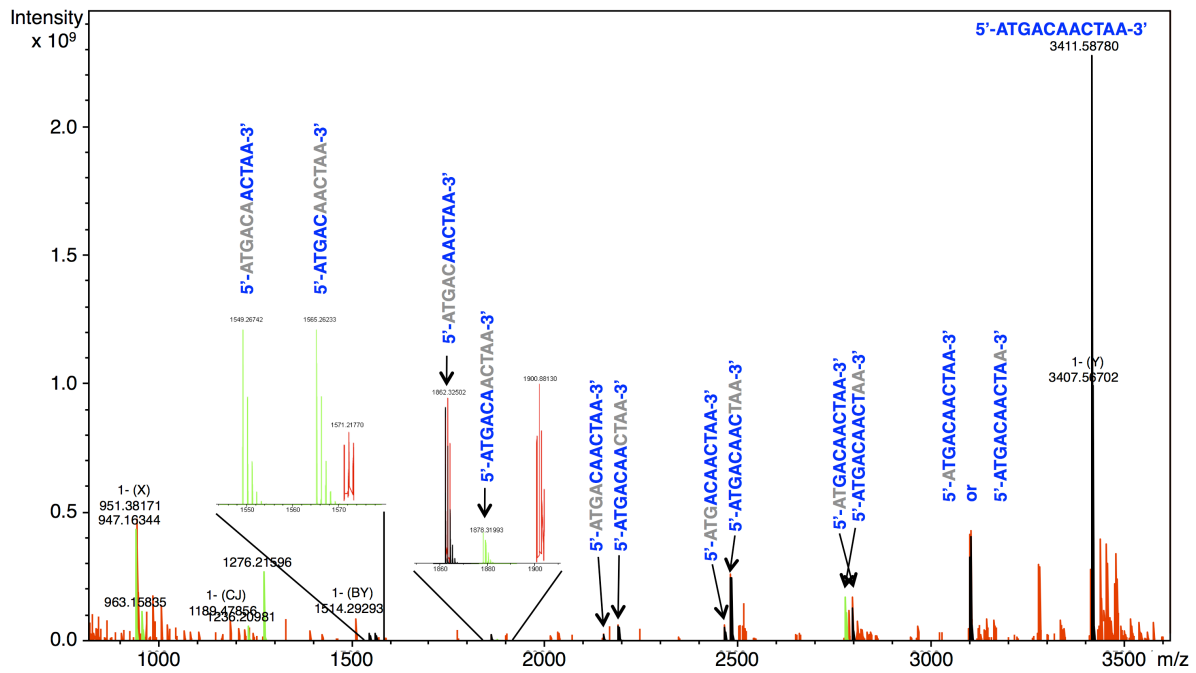**B**

|        |                   |                      |                          |         |
|--------|-------------------|----------------------|--------------------------|---------|
| 11-mer | substrate         | 5'-ATG-ACA-ACT-AA-3' | C 108 H136 N45 O 63 P 11 | 3410.59 |
| 10-mer | (5' end digested) | 5'-TG-ACA-ACT-AA-3'  | C 98 H124 N 49 O 58 P 10 | 3097.53 |
| 10-mer | (3' end digested) | 5'-ATG-ACA-ACT-A-3'  | C 98 H124 N 49 O 58 P 10 | 3097.53 |
| 9-mer  | (5' end digested) | 5'-G-ACA-ACT-A-3'    | C 88 H113 N 32 O 55 P 9  | 2793.48 |
| 9-mer  | (3' end digested) | 5'-TG-ACA-ACT-3'     | C 88 H113 N 32 O 45 P 9  | 2775.46 |
| 8-mer  | (5' end digested) | 5'-CA-ACT-AA-3'      | C 78 H99 N 33 O 55 P 8   | 2464.43 |
| 8-mer  | (3' end digested) | 5'-ATG-ACA-A-3'      | C 78 H99 N 33 O 55 P 8   | 2480.43 |
| 7-mer  | (5' end digested) | 5'-CA-ACT-AA-3'      | C 68 H87 N 28 O 40 P 7   | 2151.37 |
| 7-mer  | (3' end digested) | 5'-ATG-ACA-A-3'      | C 69 H 87 N 30 O 40 P 7  | 2191.38 |
| 6-mer  | (5' end digested) | 5'-A-ACT-AA-3'       | C 59 H 75 N 25 O 34 P 6  | 1862.33 |
| 6-mer  | (3' end digested) | 5'-ATG-ACA-3'        | C 59 H 75 N 25 O 35 P 6  | 1878.32 |
| 5-mer  | (5' end digested) | 5'-ACT-AA-3'         | C 49 H 63 N 20 O 29 P 5  | 1549.27 |
| 5-mer  | (3' end digested) | 5'-ATG-AC-3'         | C 49 H 63 N 20 O 30 P 5  | 1565.26 |
| 4-mer  | (5' end digested) | 5'-CT-AA-3'          | C 39 H 51 N 15 O 24 P 4  | 1236.21 |
| 4-mer  | (3' end digested) | 5'-ATG-A-3'          | C 40 H 51 N 17 O 24 P 4  | 1276.22 |
| 3-mer  | (5' end digested) | 5'-T-AA-3'           | C 30 H 39 N 12 O 18 P 3  | 947.16  |
| 3-mer  | (3' end digested) | 5'-ATG--3'           | C 30 H 39 N 12 O 19 P 3  | 963.16  |
| 2-mer  | (5' end digested) | 5'-AA-3'             | C 20 H 26 N 10 O 11 P 2  | 643.12  |
| 2-mer  | (3' end digested) | 5'-AT-3'             | C 20 H 27 N 7 O 13 P 2   | 634.11  |
| 1-mer  |                   | 5'-A                 | C 10 H 14 N 5 O 6 P 1    | 330.06  |
|        |                   | 5'-T                 | C 10 H 15 N 2 O 8 P 1    | 321.05  |
|        |                   | 5'-G                 | C 10 H 14 N 5 O 7 P 1    | 346.06  |
|        |                   | 5'-C                 | C 9 H 14 N 3 O 7 P 1     | 306.05  |

**Supplementary Fig. S2.** Mass spectrometric analysis of reaction products by bfNrm. Reactions were performed as described in Fig. S1A except for a longer reaction time (11 h). Other procedures were performed as described [2]. (A) The deconvoluted spectrum of reacted products of 5'-phosphorylated 11-mer ssDNA. For clarity, information concerning the major species are shown above the corresponding peaks. (B) Theoretical masses of each DNA fragment. These were calculated assuming that bfNrm hydrolyzes a phosphodiester bond at 5'-side or 3'-side of a phosphate.

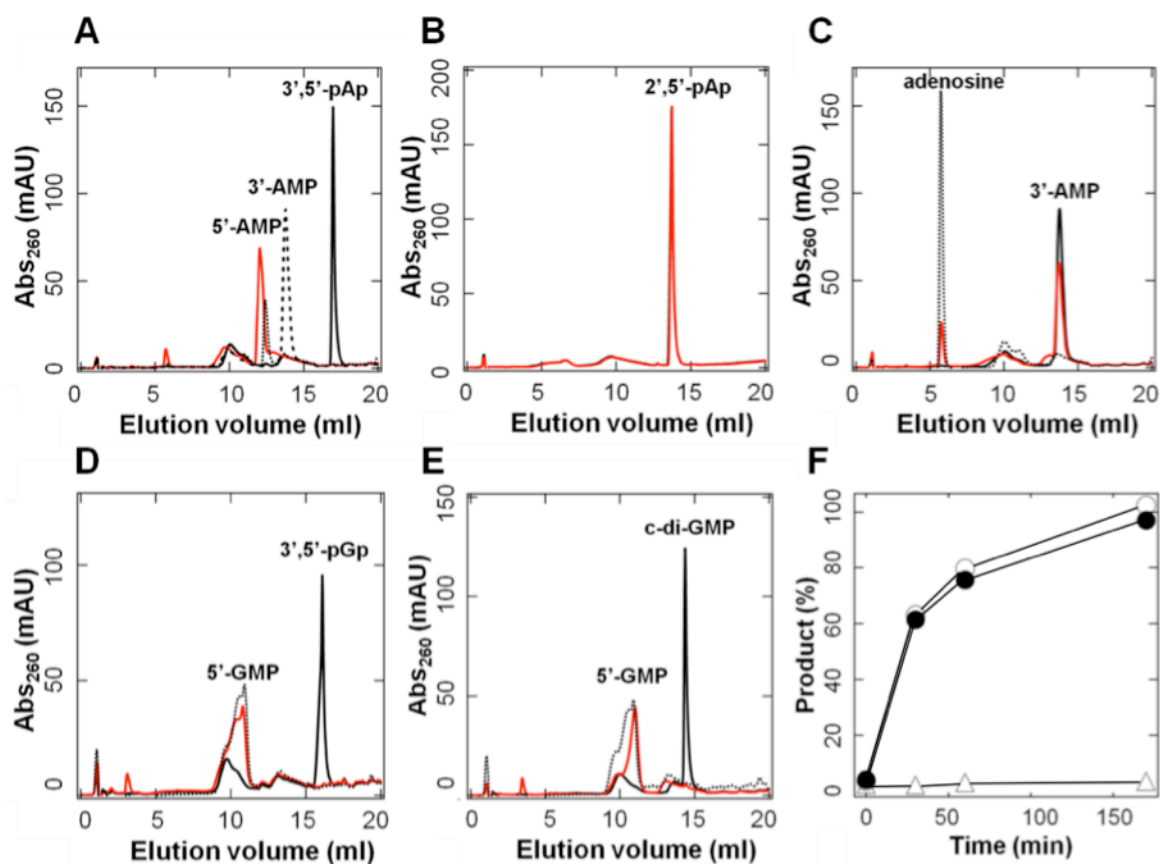

**Supplementary Fig. S3.** Phosphatase activity of bfNrn. (A–D) HPLC profile of the products of bfNrn phosphatase activity on 3',5'-pAp (A), 2',5'-pAp (B), 3'-AMP (C), 3',5'-pGp (D) and c-di-GMP (E) substrate. Elution profiles of the product of hydrolysis by bfNrn (red lines) and respective control mixtures (black lines) are shown. An aliquot of 25  $\mu$ M substrate was reacted with 0.5  $\mu$ M bfNrn at 37°C for 6 h. The reaction mixtures contained 50 mM Tris-HCl, pH 7.5, 100 mM KCl and 5 mM MnCl<sub>2</sub>. (F) Time course of reactions mediated by bfNrn. Circles, pAp; filled circles, pGp; triangles, 3'-AMP.





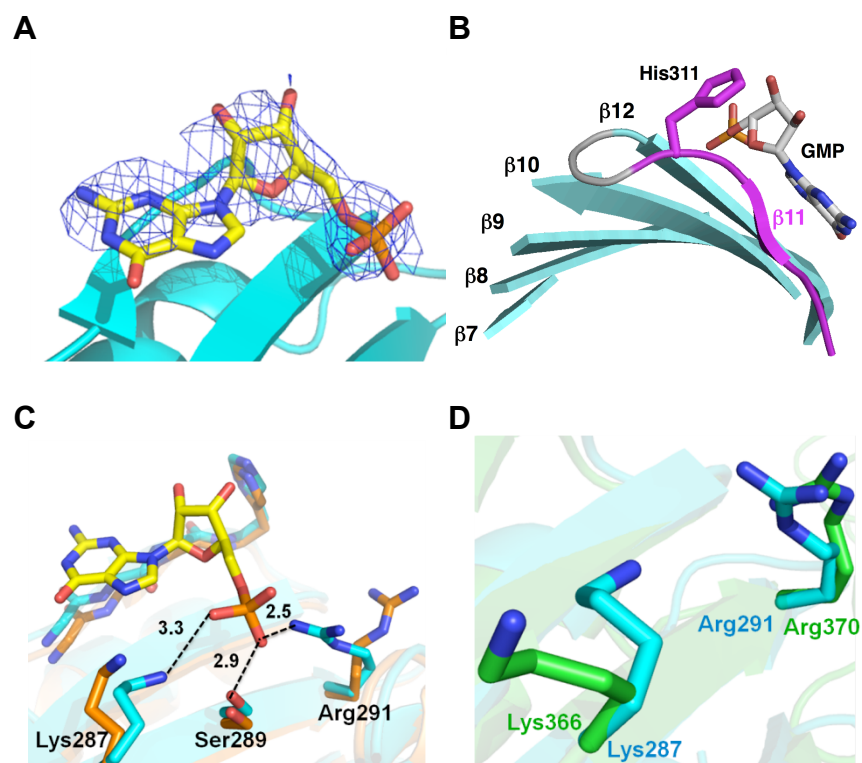

**Supplementary Fig. S5.** GMP-binding site. (A) The **Fo-Fc** electron density map (blue mesh) for the GMP is contoured at the 1.0  $\sigma$  level. (B) Conformation of  $\beta$ 11 strand formed by the DHH1A motif. (C) Comparison between  $\text{Mn}^{2+}$ -GMP complex (cyan sticks) and ligand-free form of bfNrn (orange sticks; PDB ID: 3DMA). (D) Superimposition of Lys287 and Arg291 of bfNrn (cyan sticks) with the corresponding residues of ttRecJ (green sticks; PDB ID: 2ZXP). The dashed lines indicate the distances ( $\text{\AA}$ ).

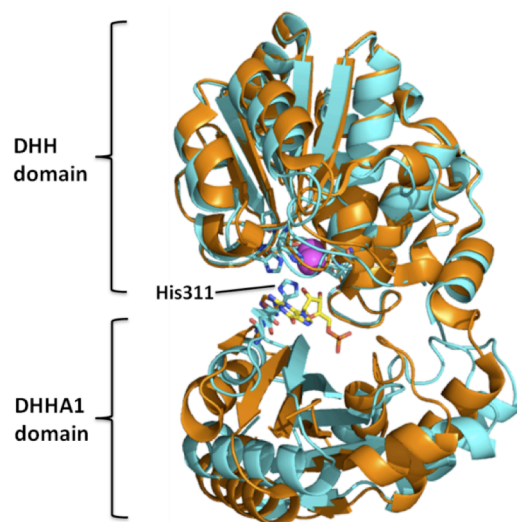

**Supplementary Fig. S6.** Putative domain closure of bfNrn to adopt a catalytically active conformation. A model structure after domain closure (cyan) was constructed by moving the DHHA1 domain to the DHH domain using Pymol. The ligand-free form of bfNrn (orange, PDB ID: 3DMA) is superimposed.

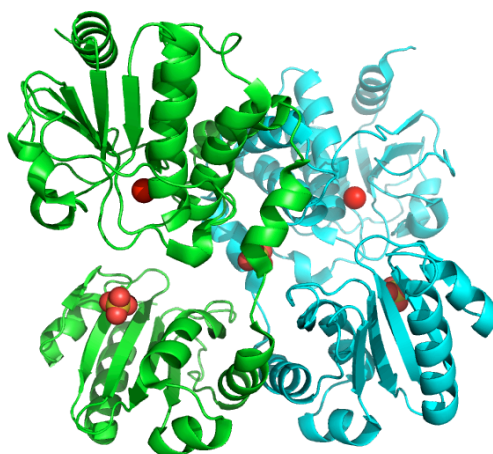

**Supplementary Fig. S7.** Position of sulfate ions in the structure of shNrn dimer (PDB ID: 3DEV). Each subunit is drawn in a different color. The position of each  $\text{Mg}^{2+}$  ion is shown as a red sphere. Three sulfate ions are shown as space-filling models colored by element type.

## Supplementary References

- [1] Wakamatsu, T., Kim, K., Uemura, Y., Nakagawa, N., Kuramitsu, S. and Masui, R. (2011) Role of RecJ-like protein with 5'-3' exonuclease activity in oligo(deoxy)nucleotide degradation. *J. Biol. Chem.* 286, 2807-2816.
- [2] Fukui, K., Takahata, Y., Nakagawa, N., Kuramitsu, S. and Masui, R. (2007) Analysis of a nuclease activity of catalytic domain of *Thermus thermophilus* MutS2 by high-accuracy mass spectrometry. *Nucleic Acids Res.* 35, e100.
- [3] Wakamatsu, T., Nakagawa, N., Kuramitsu, S. and Masui, R. (2008) Structural basis for different substrate specificities of two ADP-ribose pyrophosphatases from *Thermus thermophilus* HB8. *J. Bacteriol.* 190, 1108-1117.
- [4] Aravind, L. and Koonin, E.V. (1998) A novel family of predicted phosphoesterases includes *Drosophila* prune protein and bacterial RecJ exonuclease. *Trends Biochem. Sci.* 23, 17-19.
- [5] Sievers, F. et al. (2011) Fast, scalable generation of high-quality protein multiple sequence alignments using Clustal Omega. *Mol. Syst. Biol.* 7, 539.
